# Supplementary material for: Integrating contact tracing and whole-genome sequencing to track the elimination of dog-mediated rabies: An observational and genomic study
Source: eLife. 2023 May 25;12:e85262. doi: 10.7554/eLife.85262 (PMC10299823; doi:10.7554/eLife.85262)
Supplement: Supplementary file 1. — Data detailed for the 22 rabies virus isolates newly sequenced for this study. [file elife-85262-supp1.xlsx]

## Sheet: Sheet1
GenBank Accession	Isolate ID	Host	Geography	Region	District	NGS Platform	NGS library method	Total reads	Mapped reads	% Genome coverage at depth=5	% Genome coverage at depth=20	Mean depth	Standard deviation depth	Date symptoms started (yyyy-mm-dd)
OP375414	RAB12002	Canis lupus familiaris	Pemba Island	Kaskazini Pemba	Wete	Illumina MiSeq	Metagenomic	1093434	30793	99.87	99.79	679	167.2	2012-06-15
OP375415	RAB12005	Canis lupus familiaris	Pemba Island	Kaskazini Pemba	Micheweni	Illumina MiSeq	Metagenomic	1494738	22712	99.96	99.79	486.4	191.4	2012-05-09
OP375416	RAB12039	Bos taurus	Pemba Island	Kaskazini Pemba	Wete	Illumina MiSeq	Metagenomic	1139368	30035	99.92	99.79	655.5	276.6	2011-08-24
OP375411	RAB16024	Canis lupus familiaris	Pemba Island	Kaskazini Pemba	Wete	Illumina MiSeq	Metagenomic	1381478	42008	99.92	99.71	913.6	488.3	2016-09-21
OP375417	RAB16026	Canis lupus familiaris	Pemba Island	Kaskazini Pemba	Wete	Illumina MiSeq	Metagenomic	1582985	4970	99.92	97.02	99.4	56.8	2016-09-16
OP375408	RAB16027	Canis lupus familiaris	Pemba Island	Kusini Pemba	Chake Chake	Illumina MiSeq	Metagenomic	1167376	9676	99.91	99.4	216.8	147.9	2016-10-07
OP375418	RAB16028	Canis lupus familiaris	Pemba Island	Kaskazini Pemba	Micheweni	Illumina MiSeq	Metagenomic	930400	18318	99.97	99.9	402.5	177.6	2016-10-04
OP375413	RAB16029	Canis lupus familiaris	Pemba Island	Kusini Pemba	Mkoani	Illumina MiSeq	Metagenomic	918068	18001	99.92	99.63	395.6	214	2016-10-05
OP375410	RV2932	Canis lupus familiaris	Mainland	Kilimanjaro	Same	Illumina MiSeq	Metagenomic	330402	44718	99.9	99.62	787.7	382.8	2007-06-11
OP375407	RV2934	Canis lupus familiaris	Mainland	Dodoma		Illumina MiSeq	Metagenomic	505835	4064	99.32	96.44	80.8	48.1	2007-06-15
OP375406	RV2949	Canis lupus familiaris	Mainland	Dodoma		Illumina MiSeq	Metagenomic	192880	1622	98.72	73.17	30.9	16.8	2009-07-17
OP375412	RV3116	Canis lupus familiaris	Mainland	Mara	Serengeti	Illumina NextSeq	Metagenomic	10854298	57758	99.92	99.75	996.4	311.2	2012-05-07
OP375425	RV3229	Bos taurus	Mainland	Mara	Serengeti	Illumina NextSeq	Metagenomic	2685310	235213	99.98	99.87	3600.7	1117.6	2015-01-05
OP375426	RV3240	Canis lupus familiaris	Mainland	Mara	Serengeti	Illumina NextSeq	Metagenomic	3845425	36973	99.97	99.76	703.9	271.4	2015-05-22
OP375409	RV3253	Capra Hircus	Mainland	Mara	Serengeti	Illumina NextSeq	Metagenomic	3391459	23985	99.79	98.88	460.9	190.4	2015-06-04
OP375419	SD635	Feliz catus	Mainland	Mara	Serengeti	Illumina NextSeq	Metagenomic	840141	5107	99.04	98.67	115.8	35.8	2016-06-07
OP375420	SD643	Capra hircus	Mainland	Mara	Serengeti	Illumina NextSeq	Metagenomic	2405280	37025	99.8	99.43	720.6	258.9	2017-05-14
OP375421	SD645	Canis lupus familiaris	Mainland	Mara	Serengeti	Illumina NextSeq	Metagenomic	1049508	3789	98.9	91.45	84.4	87.5	2016-12-30
OP375422	SD647	Canis lupus familiaris	Mainland	Mara	Serengeti	Illumina NextSeq	Metagenomic	192217	1041	98.36	68.73	23.7	8.4	2016-08-18
OP375423	SD670	Canis lupus familiaris	Mainland	Mara	Serengeti	Illumina NextSeq	Metagenomic	2793012	6170	99.4	99.21	129.5	46.3	2017-04-11
OP375424	SD678	Canis lupus familiaris	Mainland	Mara	Serengeti	Illumina NextSeq	Metagenomic	2033180	6274	99.51	99.28	134.3	60.6	2016-10-06
OP375427	SUB7101	Canis lupus familiaris	Mainland	Mara	Serengeti	Illumina NextSeq	Metagenomic	4141198	4301	99.26	98.02	90.7	40.9	2015-09-24
Epidemiological and next generation sequencing (NGS) metadata for 22 rabies virus isolates newly sequenced for this study.
